# Supplementary material
Source: PubMed Central journal article supplement (PMC1622866)
Supplement: pnas_0604524103_1.pdf [file pnas_0604524103_1.pdf]

Extract:

Whole Cell

Cytoplasmic

Nuclear

Blotting: SF2/ASF

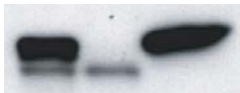

- Phosphorylated  
- Hypophosphorylated

SC35

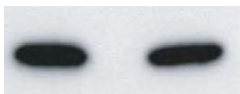

Histone H3

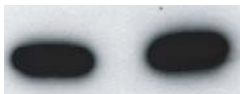

$\alpha$ -Tubulin

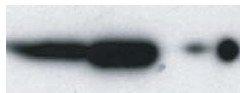

1

2

3
