# Supplementary material
Source: PubMed Central journal article supplement (PMC1622866)

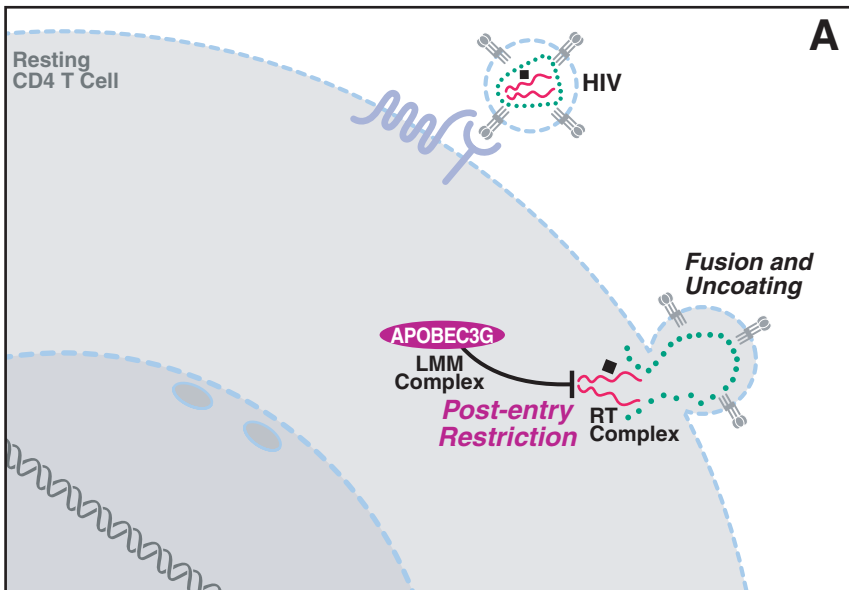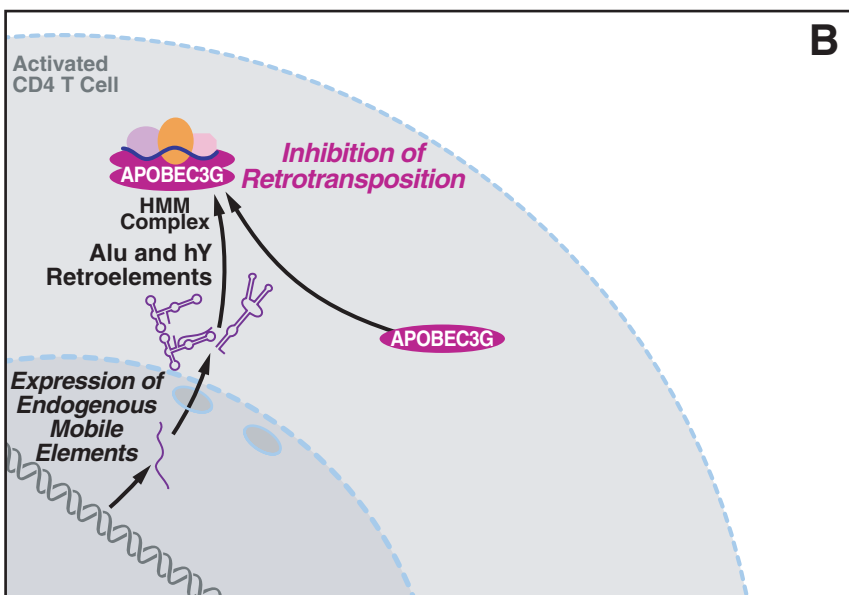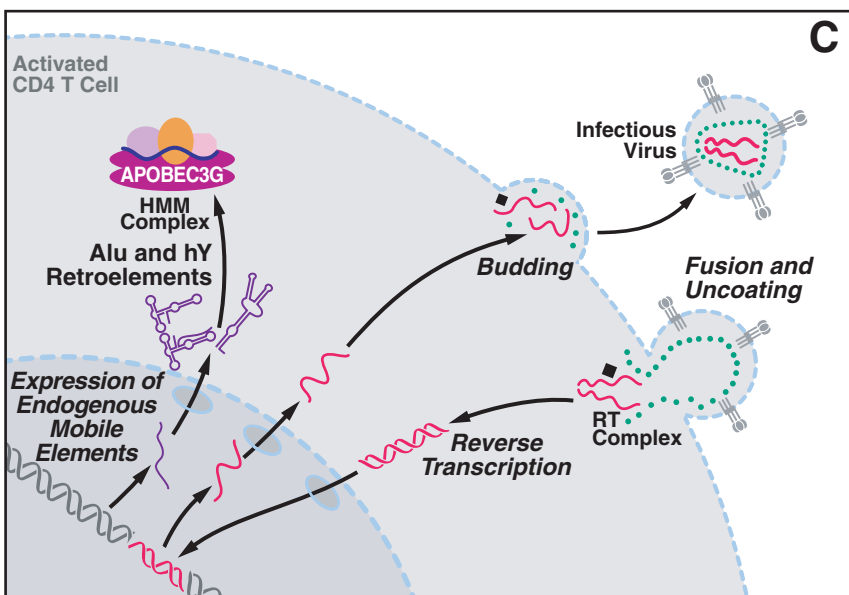

Supplement: pnas_0604524103_10.pdf [file pnas_0604524103_10.pdf]

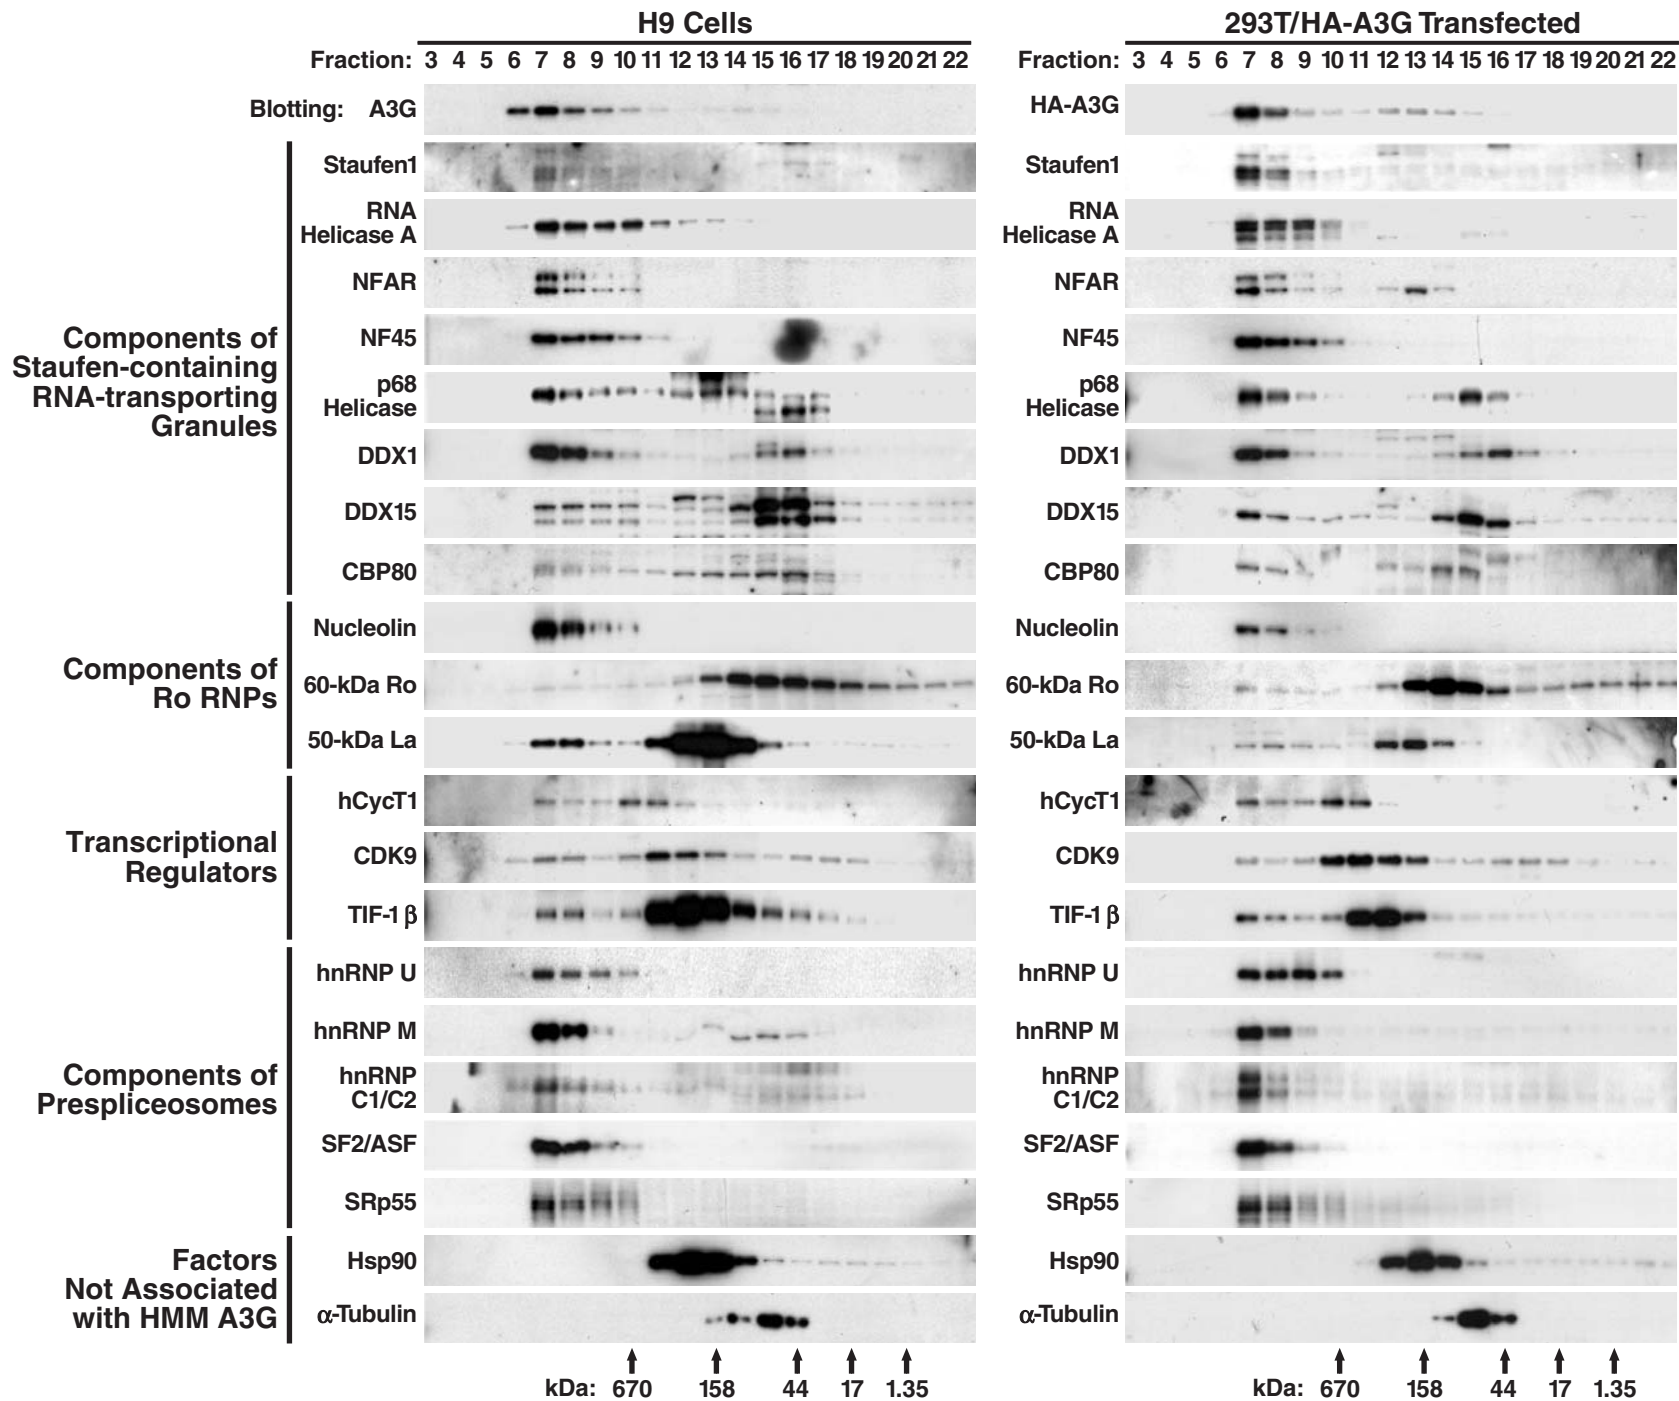

Supplement: pnas_0604524103_2.pdf [file pnas_0604524103_2.pdf]

**A**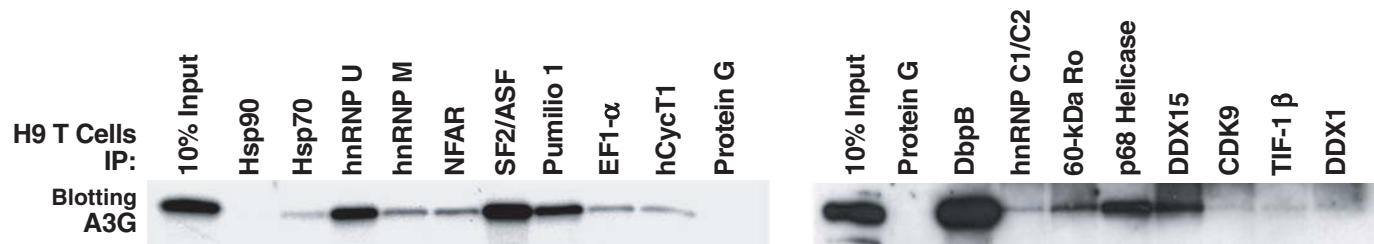**B**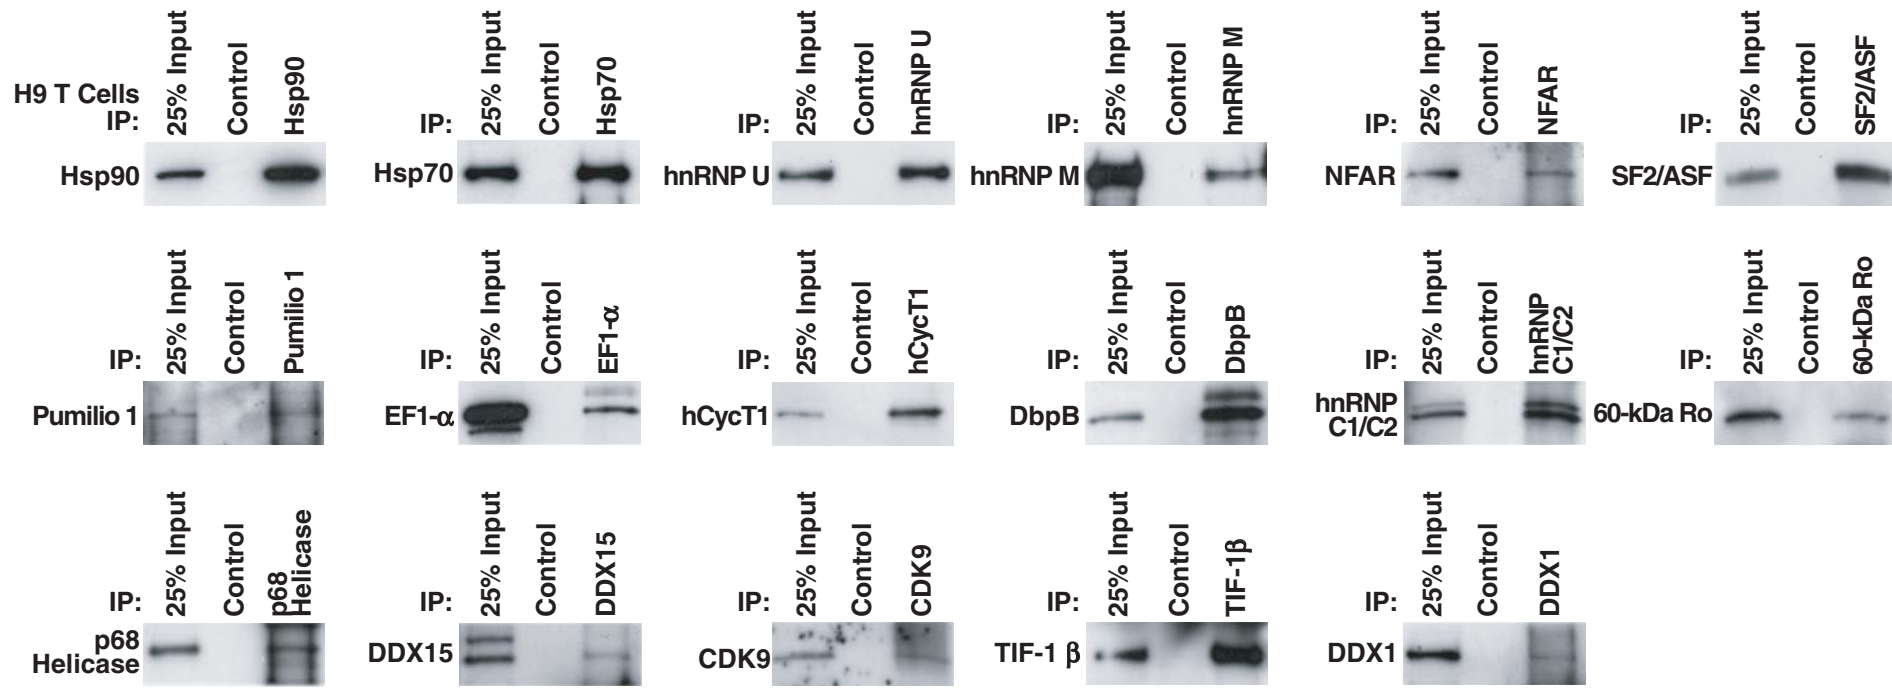

Supplement: pnas_0604524103_3.pdf [file pnas_0604524103_3.pdf]

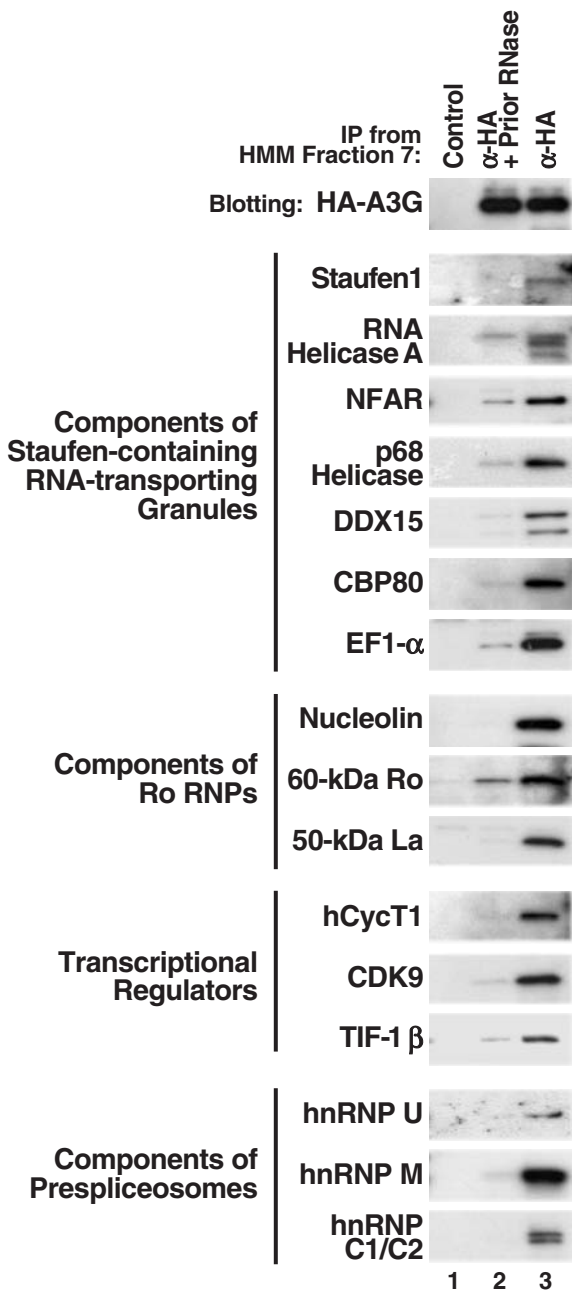

Supplement: pnas_0604524103_4.pdf [file pnas_0604524103_4.pdf]

**A**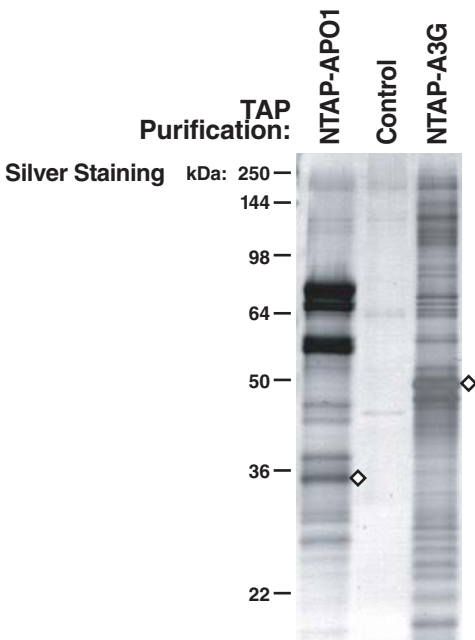**B**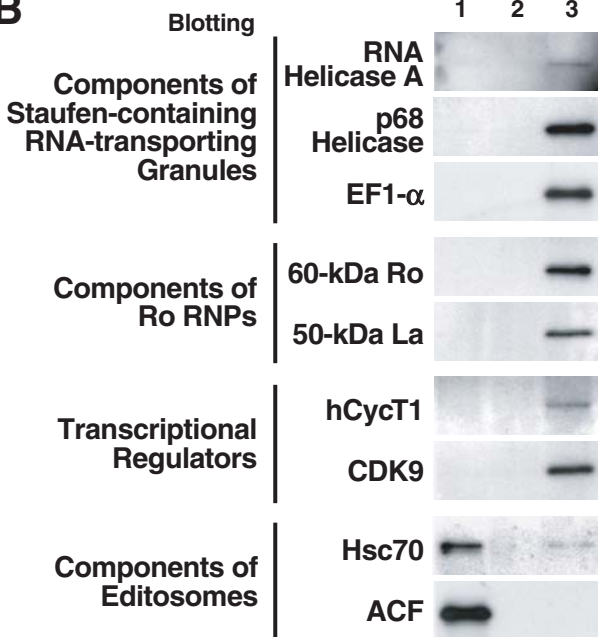

Supplement: pnas_0604524103_5.pdf [file pnas_0604524103_5.pdf]

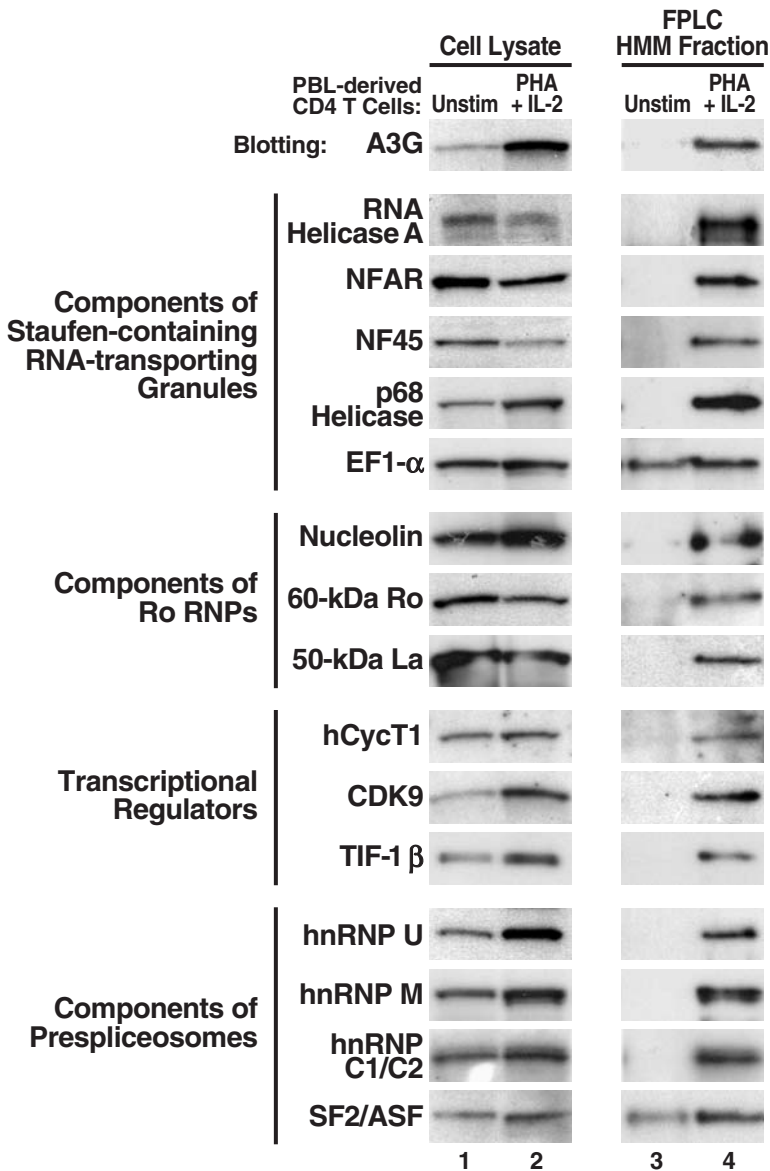

Supplement: pnas_0604524103_7.pdf [file pnas_0604524103_7.pdf]

**A**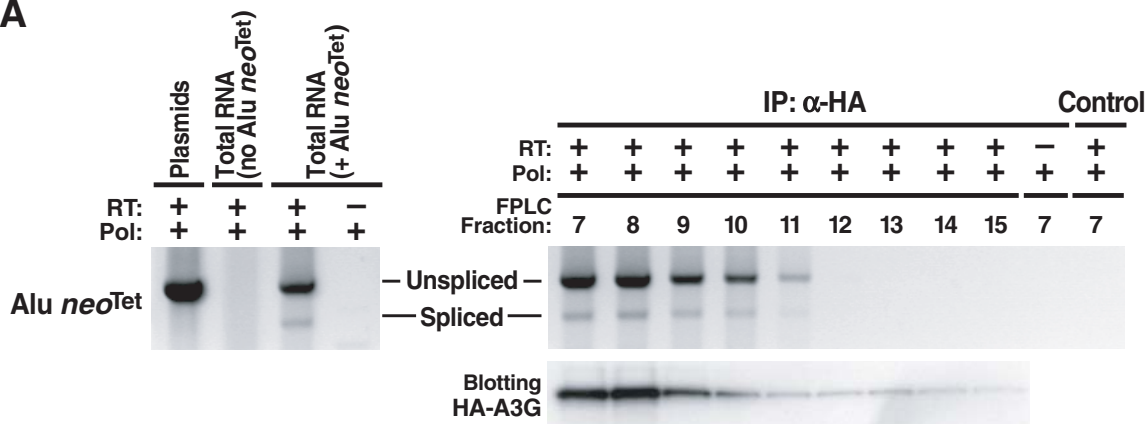**B**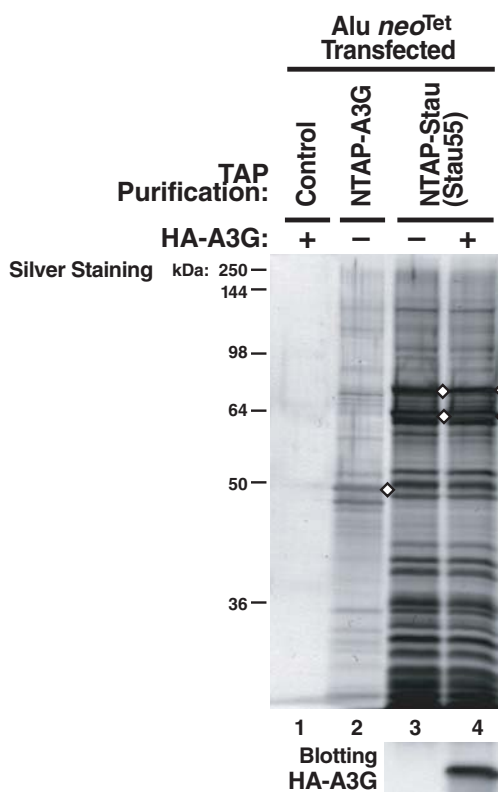**C**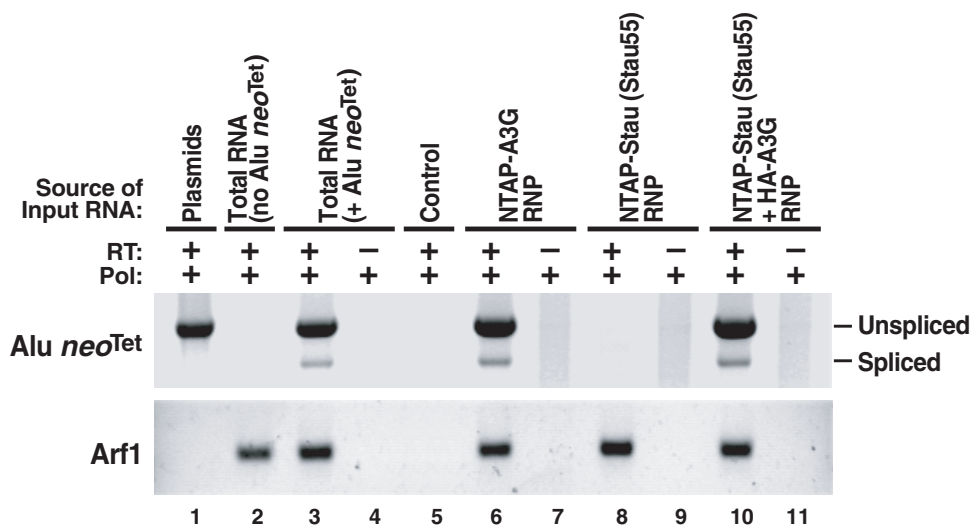

Supplement: pnas_0604524103_8.pdf [file pnas_0604524103_8.pdf]

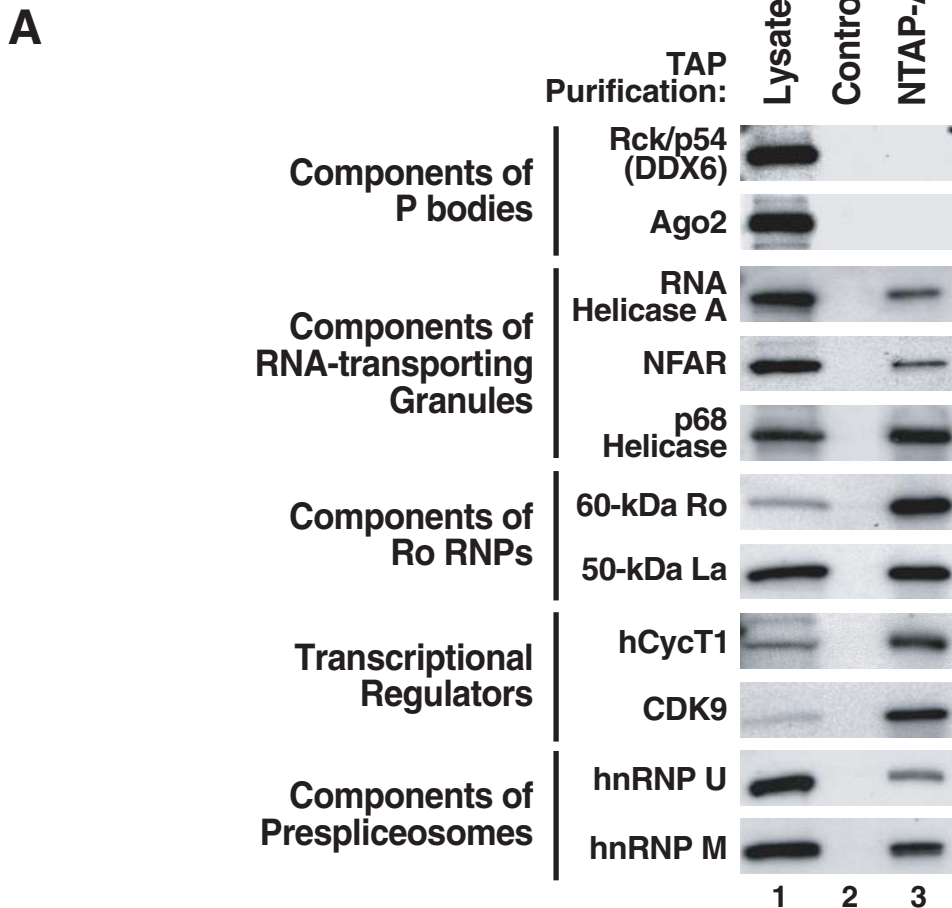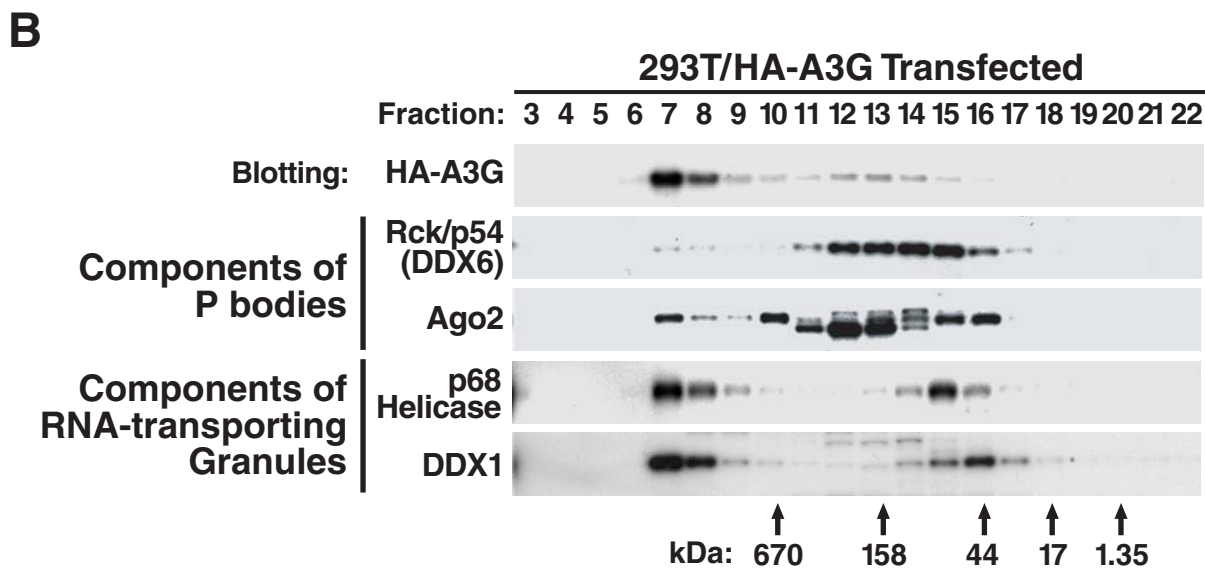

Supplement: pnas_0604524103_9.pdf [file pnas_0604524103_9.pdf]
